# Supplementary material
Source: Springer Nature journal article supplement (https://www.springerprofessional.de/resource/supplementary/13688_2014_13_MOESM25_ESM.pdf/11893772)

# Puzzle 4/s2 user flow

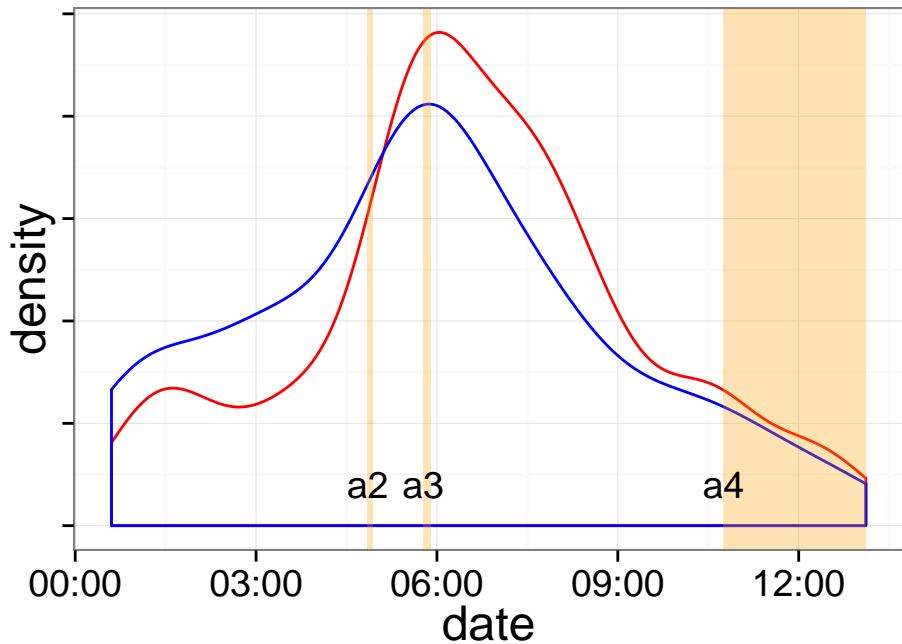

type

- in
- out

Supplement: MOESM25 [file 11893772]
